# Supplementary material for: All-in-one porous membrane enables full protection in guided bone regeneration
Source: Springer Nature journal article supplement (doi:10.1038/s41467-023-43476-9), 2024-01-02
Supplement: MOESM1 [file 41467_2023_43476_MOESM1_ESM.pdf]

## Supplementary Information

### **All-in-one asymmetric porous membrane enables full protection in guided bone regeneration**

Shuyi Wu<sup>1, #</sup>, Shulu Luo<sup>1, #</sup>, Zongheng Cen<sup>2, #</sup>, Qianqian Li<sup>1</sup>, Luwei Li<sup>1</sup>, Weiran Li<sup>1</sup>, Zhike Huang<sup>3</sup>, Wenyi He<sup>2</sup>, Guobin Liang<sup>1</sup>, Dingcai Wu<sup>2, \*</sup>, Minghong Zhou<sup>3, \*</sup> & Yan Li<sup>1, \*</sup>

<sup>1</sup> Hospital of Stomatology, Guanghua School of Stomatology, Guangdong Provincial Key Laboratory of Stomatology, Sun Yat-sen University, Guangzhou 510055, P. R. China.

<sup>2</sup> Key Laboratory for Polymeric Composite and Functional Materials of Ministry of Education, School of Chemistry, Sun Yat-sen University, Guangzhou 510006, P.R. China.

<sup>3</sup> Medical Research Institute, Guangdong Provincial People's Hospital (Guangdong Academy of Medical Sciences), Southern Medical University, Guangzhou 510080, P. R. China.

<sup>#</sup> These authors contributed equally: Shuyi Wu, Shulu Luo, Zongheng Cen.

<sup>\*</sup> Corresponding author's email: liy8@mail.sysu.edu.cn; zhouminghong@gdph.org.cn; wudc@mail.sysu.edu.cn

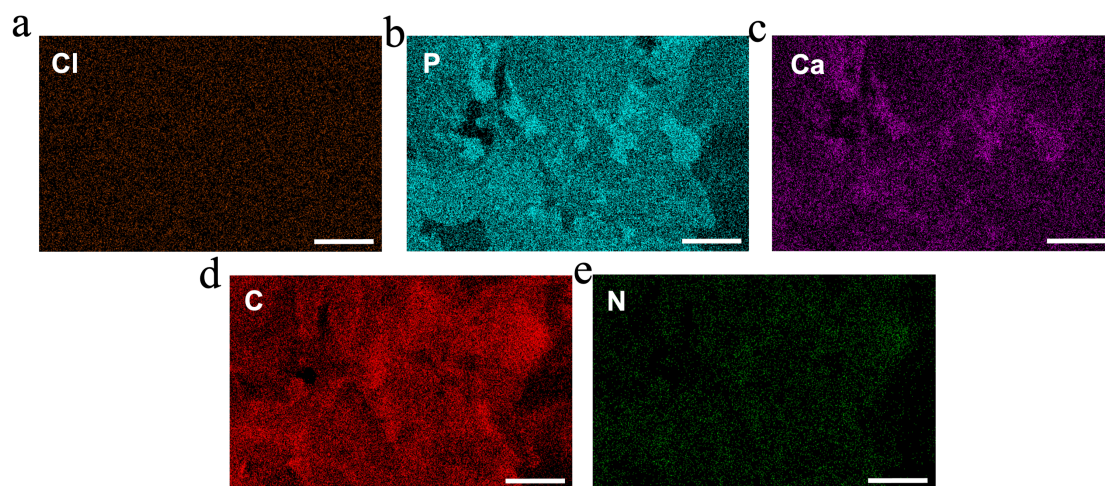

**Supplementary Fig. 1 Elemental distributions of BC-g-NCl/CS-HAP membrane.**

**a** Elemental mapping image of Cl (**a**) in the BC-g-NCl layer (scale bar = 2  $\mu\text{m}$ ), showing Cl element was evenly introduced in BC-g-NCl layer. **b-e** Elemental mapping images of P (**b**), Ca (**c**), C (**d**) and N (**e**) in the CS-HAP layer (scale bars = 10  $\mu\text{m}$ ), showing HAP particles and CS were well composited in CS-HAP layer. Observation was repeated three times independently, yielding similar results.

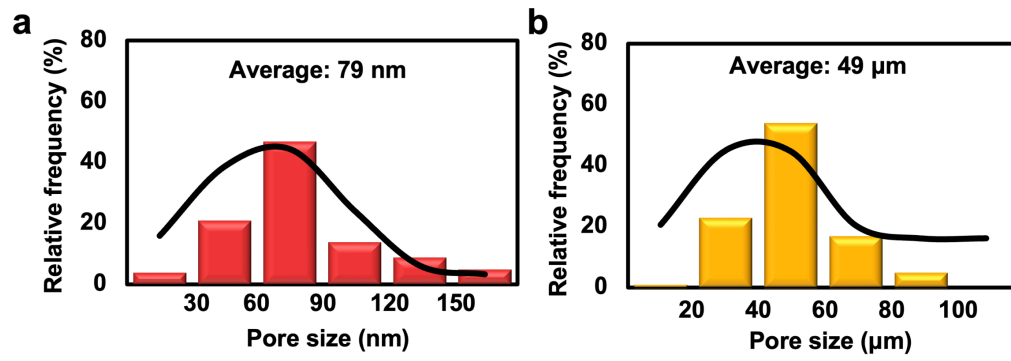

**Supplementary Fig. 2 Pore size distributions of the dense and loose layers. a, b** Pore size distributions of BC-g-PNCl dense layer **(a)** and CS-HAP loose layer **(b)** of BC-g-PNCl/CS-HAP according to the analyses of SEM images in Fig. 2e, f.

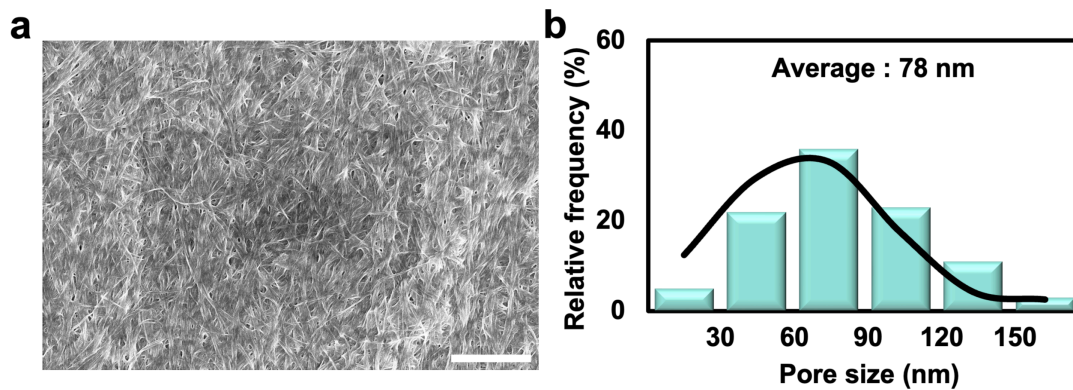

**Supplementary Fig. 3 Surface morphology and pore size distribution of BC. a, b** SEM image **(a)** (scale bar = 2  $\mu\text{m}$ ) and corresponding pore size distribution **(b)** of BC. SEM observation was repeated three times independently, yielding similar results.



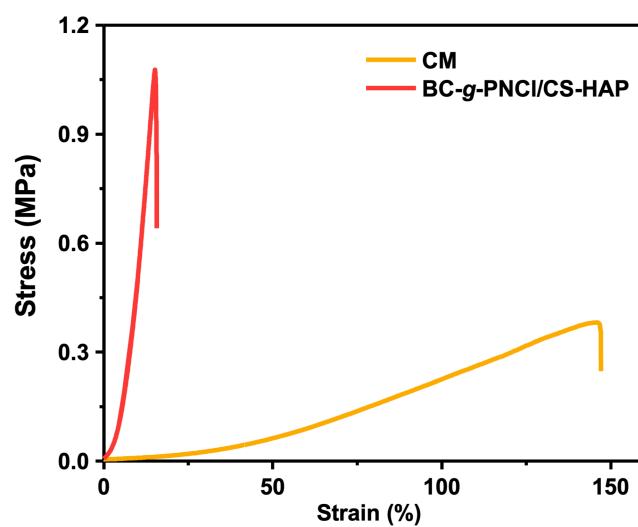

**Supplementary Fig. 4 Tensile stress-strain curves of CM and BC-*g*-PNCl/CS-HAP in the wet state.**

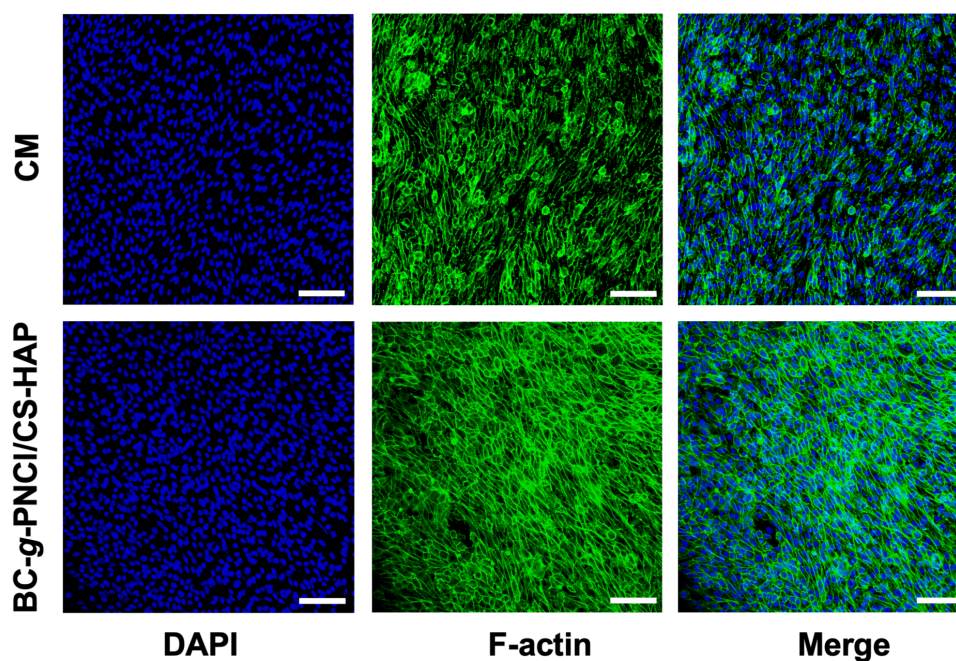

**Supplementary Fig. 5 Morphology, extension, and viability of L929s.** Morphology of L929s cultured on dense layer of CM and BC-g-PNCl layer of BC-g-PNCl/CS-HAP at the 7<sup>th</sup> day (green for F-actin, blue for cell nucleus, scale bars = 100 μm). Fluorescent observation was repeated three times independently, yielding similar results.

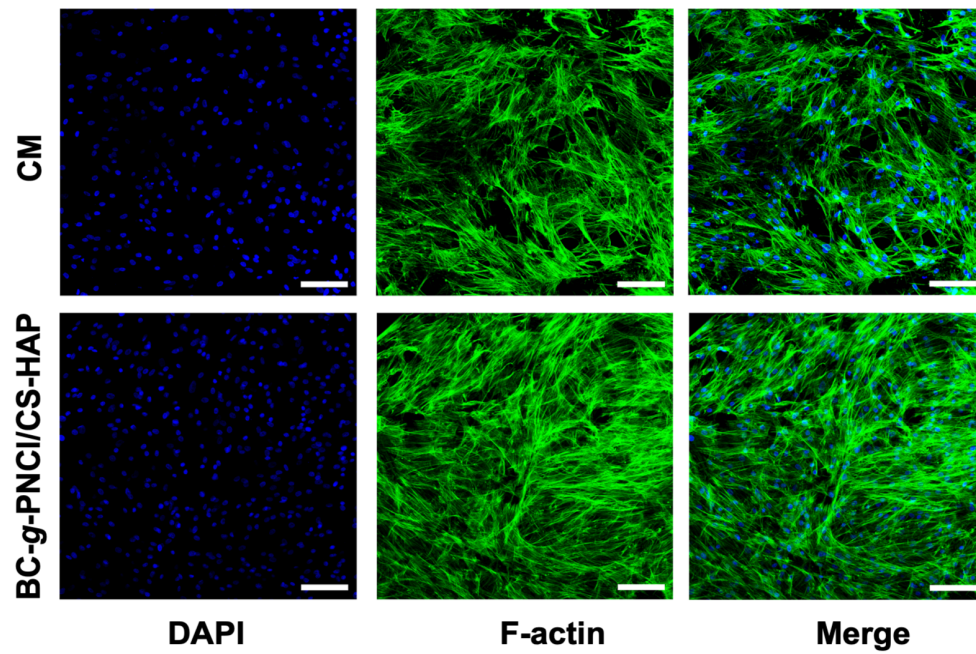

**Supplementary Fig. 6 Morphology, extension, and viability of BMSCs.** Morphology of BMSCs cultured on loose layer of CM and CS-HAP layer of BC-g-PNCI/CS-HAP at the 7<sup>th</sup> day (green for F-actin, blue for cell nucleus, scale bars =100 μm). Fluorescent observation was repeated three times independently, yielding similar results.

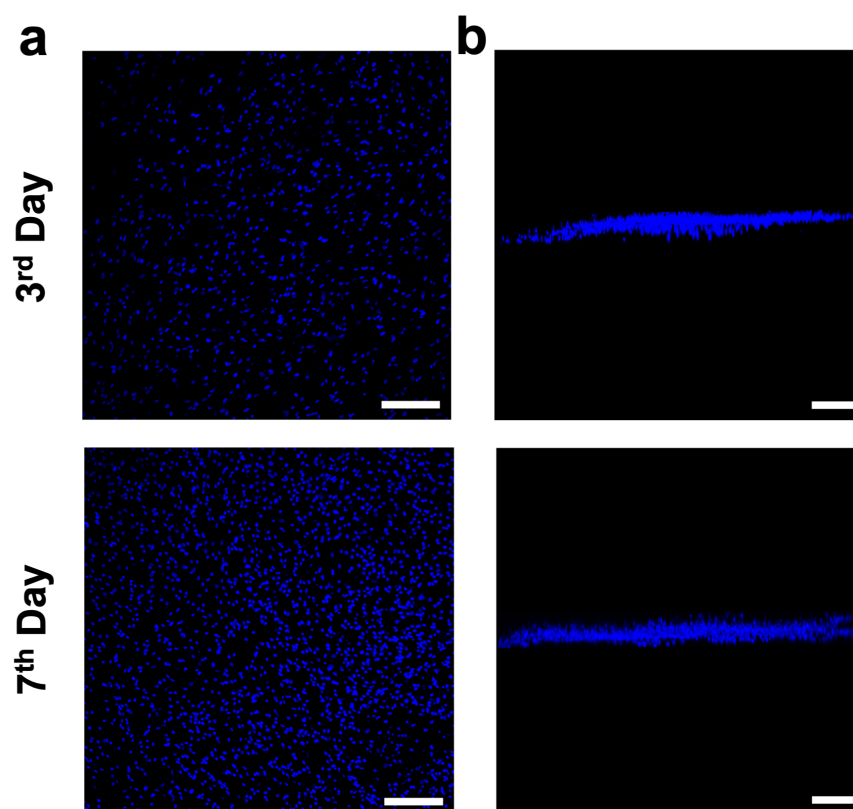

**Supplementary Fig. 7 Proliferation and distribution of BMSCs.** **a, b** Top-view (**a**) and cross-section (**b**) fluorescent images exhibiting the proliferation area and depth of BMSCs cultured on CS-HAP layer of BC-g-PNCI/CS-HAP at the 3<sup>rd</sup> and 7<sup>th</sup> days, respectively (blue for cell nucleus, scale bars = 200  $\mu\text{m}$ ). Fluorescent observation was repeated three times independently, yielding similar results.

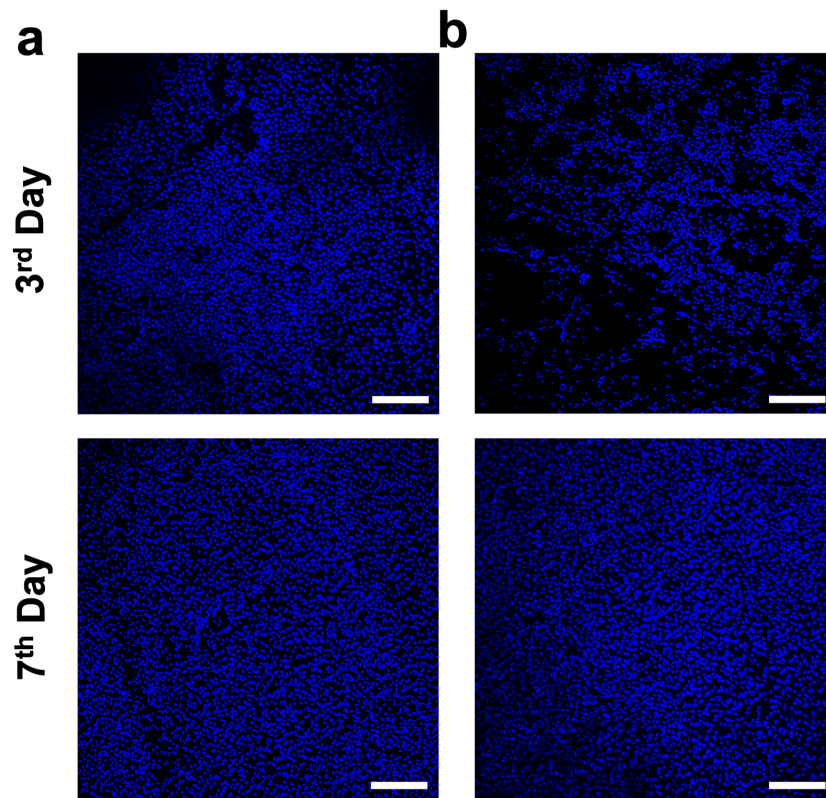

**Supplementary Fig. 8 Proliferation and distribution of L929s.** Top-view fluorescent images exhibiting the proliferation area of L929s cultured on dense layer of CM **(a)** and BC-g-PNCl layer of BC-g-PNCl/CS-HAP **(b)** at the 3<sup>rd</sup> and 7<sup>th</sup> days, respectively (blue for cell nucleus, scale bars = 200  $\mu\text{m}$ ). Fluorescent observation was repeated three times independently, yielding similar results.

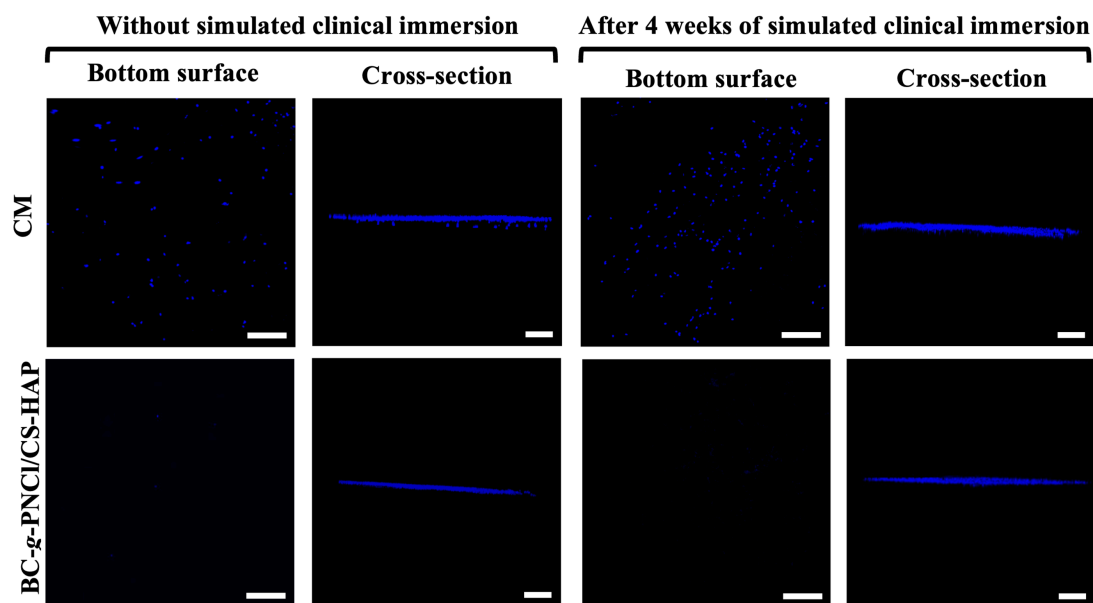

**Supplementary Fig. 9 Barrier function against L929s.** Fluorescent images of penetrated cells on the bottom surfaces and penetration depths after 3 days for CM and BC-g-PNCl/CS-HAP, exhibiting their barrier functions against L929s before and after simulated clinical immersion for 4 weeks (blue for cellular nucleus, scale bars = 200  $\mu\text{m}$ ). Fluorescent observation was repeated three times independently, yielding similar results.

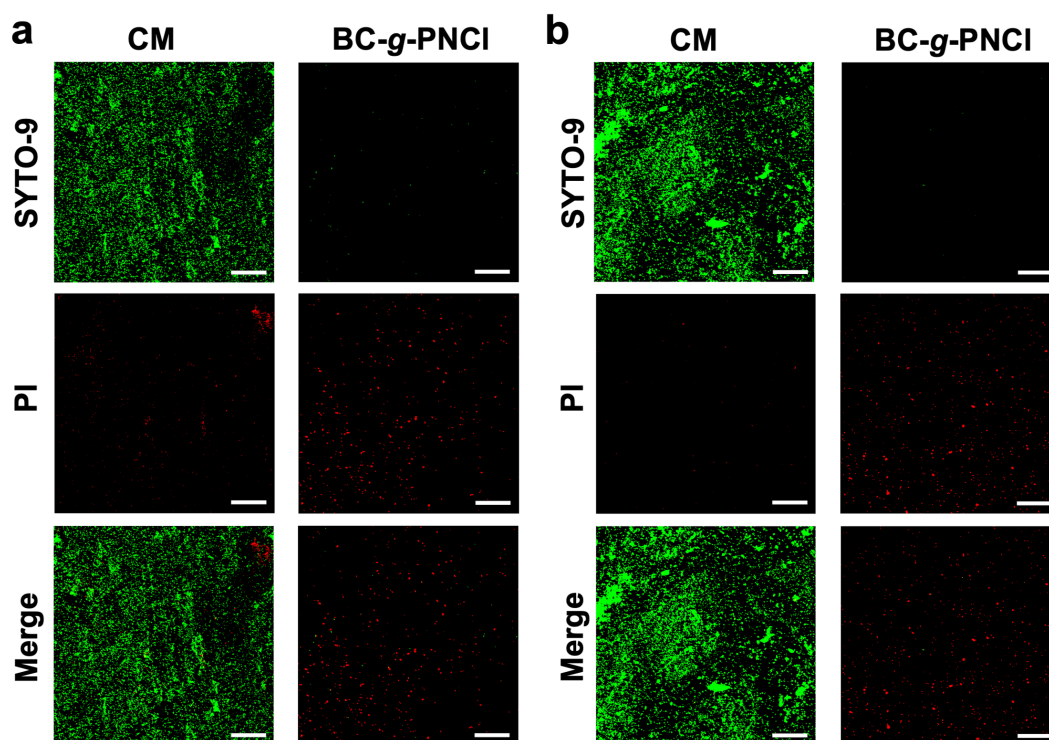

**Supplementary Fig. 10 Anti-adhesion and anti-bacterial performances.** **a, b** Fluorescent images exhibiting the live/dead bacterial distributions of *S. aureus* (**a**) and *P. gingivalis* (**b**) on the surfaces of CM and BC-g-PNCl. Only sporadic dead bacteria exist on the surface of BC-g-PNCl, while plenty of live bacteria are bred on the surface of CM (green for live bacteria, red for dead bacteria, scale bars = 50  $\mu$ m). Fluorescent observation was repeated three times independently, yielding similar results.

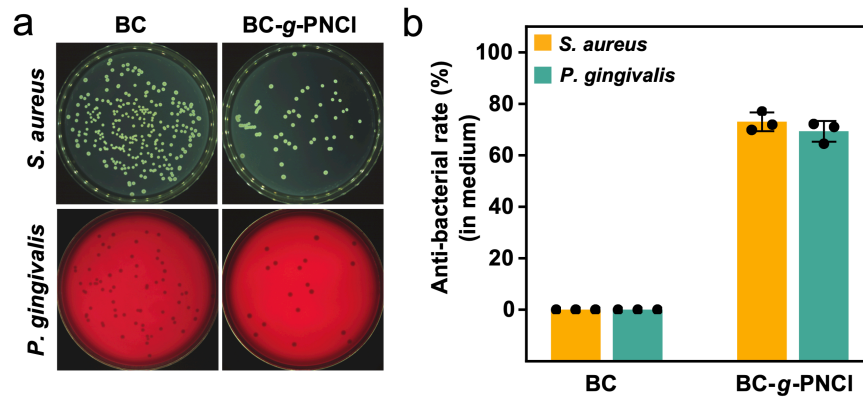

**Supplementary Fig. 11 Release-killing ability.** **a** Images of the bacterial colonies formed by *S. aureus* and *P. gingivalis* in the medium treated with BC and BC-g-PNCI. **b** Release-killing rates of BC and BC-g-PNCI against *S. aureus* and *P. gingivalis* according to **a** (n = 3 independent samples; error bars = SD; data are presented as mean values  $\pm$  SD).



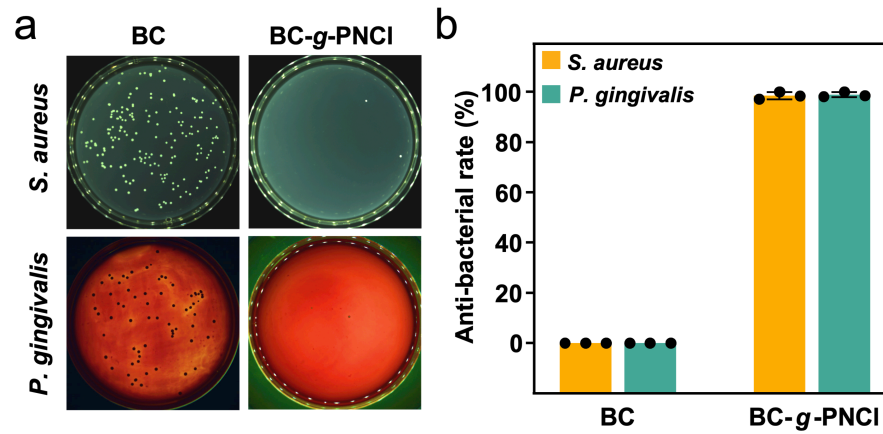

**Supplementary Fig. 12 Contact-killing ability.** **a** Images of the bacterial colonies formed by *S. aureus* and *P. gingivalis* contacted with BC and BC-g-PNCI. **b** Contact-killing rates against *S. aureus* and *P. gingivalis* contacted with BC and BC-g-PNCI according to **a** (n = 3 independent samples; error bars = SD; data are presented as mean values  $\pm$  SD).

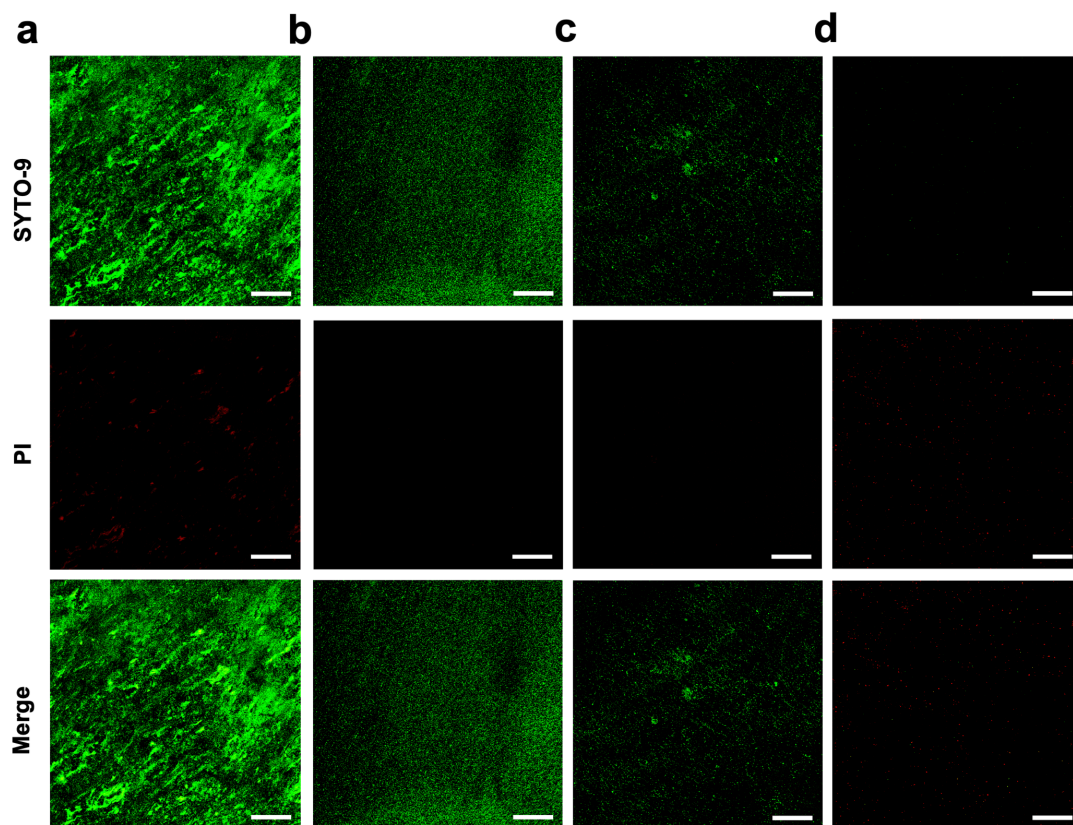

**Supplementary Fig. 13 Anti-adhesion ability.** Fluorescent images exhibiting bacterial adhesion of *S. aureus* on the surfaces of CM dense layer (**a**), BC (**b**), BC-g-PAM (**c**), and BC-g-PNCl (**d**) (green for live bacteria , red for dead bacteria , scale bars = 200  $\mu$ m). Fluorescent observation was repeated three times independently, yielding similar results.

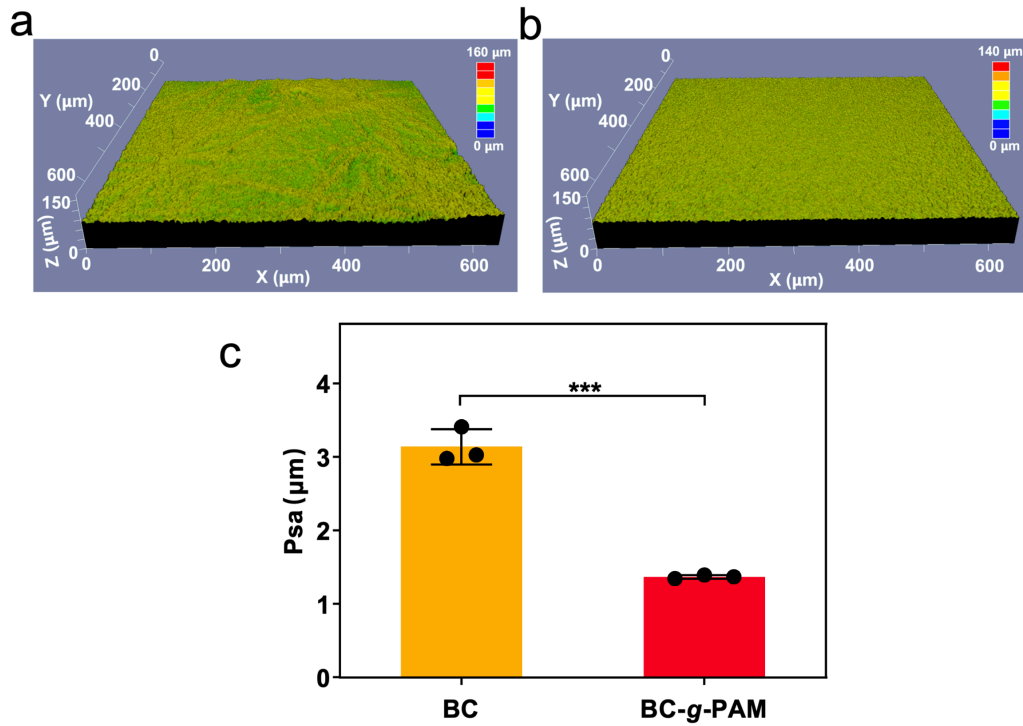

**Supplementary Fig. 14 Surface roughness of BC and BC-g-PAM. a, b** Roughness of BC (**a**) and BC-g-PAM (**b**). **c** Roughness analysis between BC and BC-g-PAM ( $n = 3$  independent samples; Student's  $t$  test; \*\*\* two-tailed  $p = 0.0002$ ; error bars = SD; data are presented as mean values  $\pm$  SD).

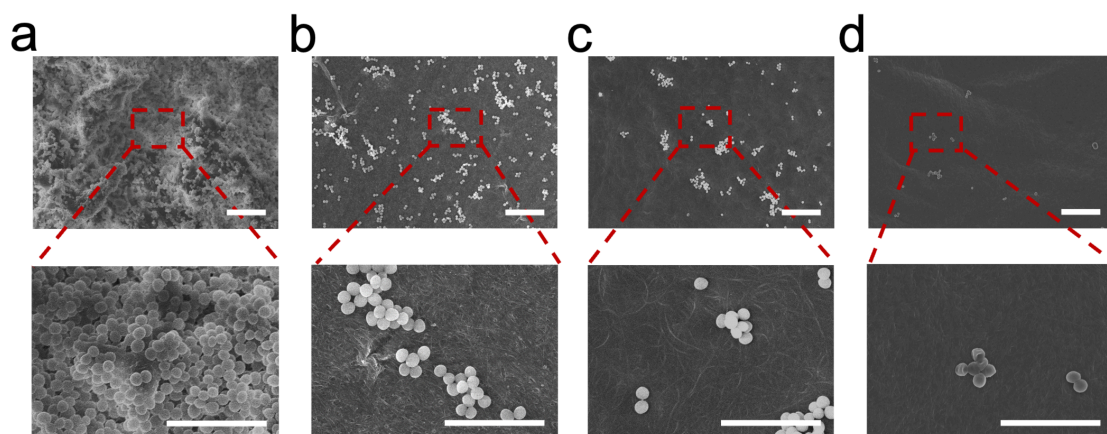

**Supplementary Fig. 15 Anti-adhesion and anti-biofilm capacities.** **a-d** SEM images exhibiting the bacterial adhesion situation of *S. aureus* on the surfaces of CM (**a**), BC (**b**), BC-g-PAM (**c**), and BC-g-PNCl (**d**). The number of bacteria on the surfaces of the CM dense layer, BC, BC-g-PAM, and BC-g-PNCl is gradually reduced (upper scale bars = 10  $\mu\text{m}$ , lower scale bars = 5  $\mu\text{m}$ ) . SEM observation was repeated three times independently, yielding similar results.

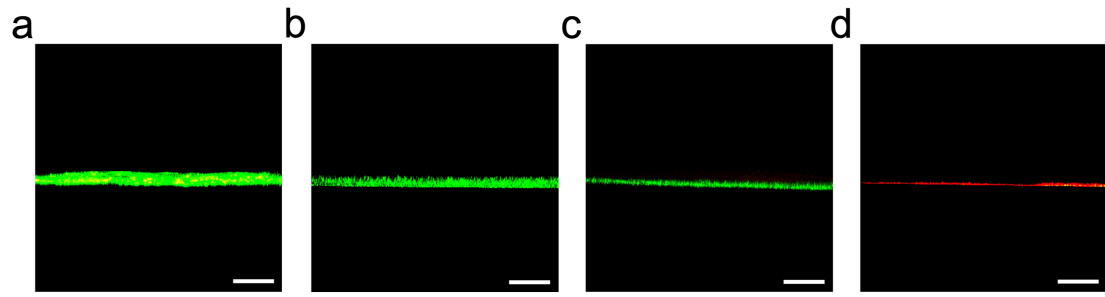

**Supplementary Fig. 16 Anti-biofilm capacities.** Three-dimensional fluorescent images exhibiting the bacterial adhesion situation of *S. aureus* on the surfaces of CM (a), BC (b), BC-g-PAM (c), and BC-g-PNCI (d). The depth of biofilm on the surfaces of the CM dense layer, BC, BC-g-PAM, and BC-g-PNCI is gradually reduced (green for live bacteria, red for dead bacteria, scale bars = 200  $\mu\text{m}$ ). Fluorescent observation was repeated three times independently, yielding similar results.

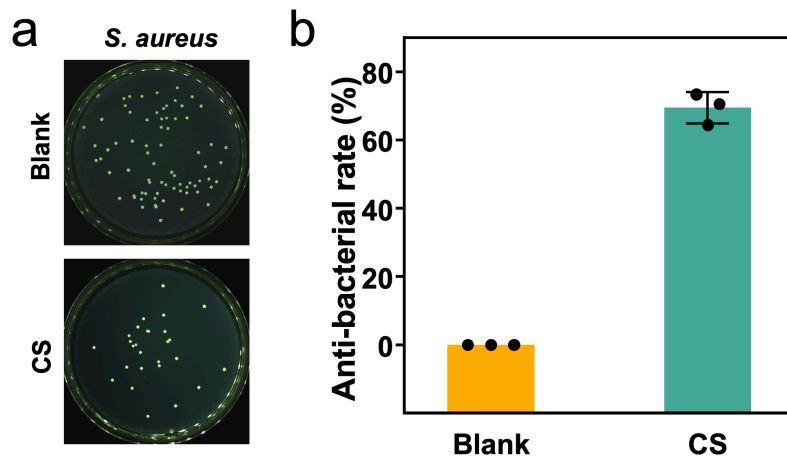

**Supplementary Fig. 17 Anti-bacterial ability of CS.** **a** Images of the bacterial colonies formed by *S. aureus* in the medium in the blank group and CS group. **b** Anti-bacterial rate of CS against *S. aureus* according to **a** (n = 3 independent samples; error bars = SD; data are presented as mean values  $\pm$  SD).

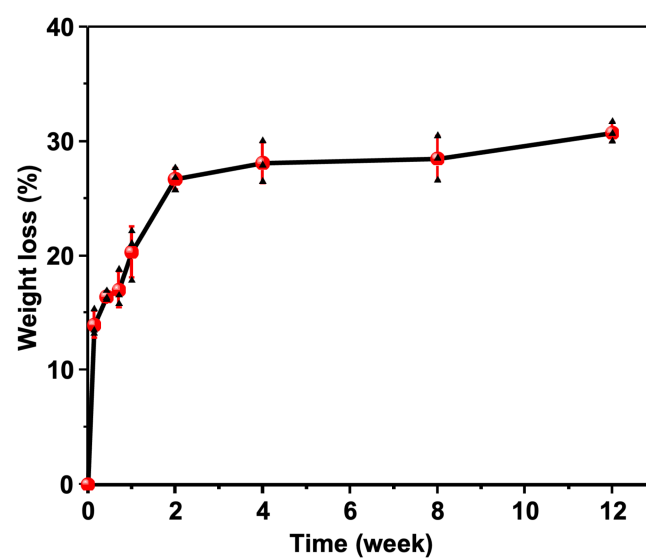

**Supplementary Fig. 18 Degradation of BC-g-PNCI/CS-HAP after incubation in PBS for 12 weeks** (n = 3 independent samples; error bars = SD; data are presented as mean values  $\pm$  SD).

**Supplementary Table 1 Primer sequences used for RT-qPCR**

| <b>Genes</b> | <b>Primers</b>                                                                         |
|--------------|----------------------------------------------------------------------------------------|
| <i>ALP</i>   | Forward: 5' - GCACAACATCAAGGACATCG - 3'<br>Reversed: 5' - TCAGTTCTGTTCTTGGGGTACAT - 3' |
| <i>Col1</i>  | Forward: 5' - GGTTTGGAGAGAGCATGACC - 3'<br>Reversed: 5' - TTTGGGGAAATTGAGTTTGG - 3'    |
| <i>RUNX2</i> | Forward: 5' - GCGGTGCAAACCTTTCTCCAG - 3'<br>Reversed: 5' - TGCAGCCTTAAATGACTCGG - 3'   |
| <i>OCN</i>   | Forward: 5' - CCCAATTGTGACGAGCTAGC - 3'<br>Reversed: 5' - CTGTGCCGTCCATACTTTCG - 3'    |
| <i>GAPDH</i> | Forward: 5' - TCTCTGCTCCTCCCTGTTCT - 3'<br>Reversed: 5' - CCGATACGGCCAAATCCGTT - 3'    |
